# Supplementary material for: Reviews and syntheses: Insights into deep-sea food webs and global environmental gradients revealed by stable isotope ( δ 15 N, δ 13 C) and fatty acid trophic biomarkers
Source: Copernicus journal article supplement (doi:10.5194/bg-16-2837-2019), 2019-07-18
Supplement: Supplementary file [file bg-16-2837-2019-supplement-title-page.pdf › bg-16-2837-2019-supplement-title-page.pdf]

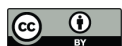

## *Supplement of*

# **Reviews and syntheses: Insights into deep-sea food webs and global environmental gradients revealed by stable isotope ( $\delta^{15}\text{N}$ , $\delta^{13}\text{C}$ ) and fatty acid trophic biomarkers**

**Camilla Parzanini et al.**

*Correspondence to:* Camilla Parzanini (cparzanini@ryerson.ca)

- bg-16-2837-2019-supplement-title-page.pdf
- Supplement
  - Table S1.xlsx
  - Table S2.xlsx

The copyright of individual parts of the supplement might differ from the CC BY 4.0 License.
